# Supplementary material for: The RNA-binding protein HuR modulates the expression of the disease-linked CCL2 rs1024611G-rs13900T haplotype
Source: eLife journal article supplement (doi:10.7554/elife.93108), 2024-01-23
Supplement: fig4-data1 [file Figure 4 -Source Data-1.pdf › Figure 4 -Source Data-1.pdf]

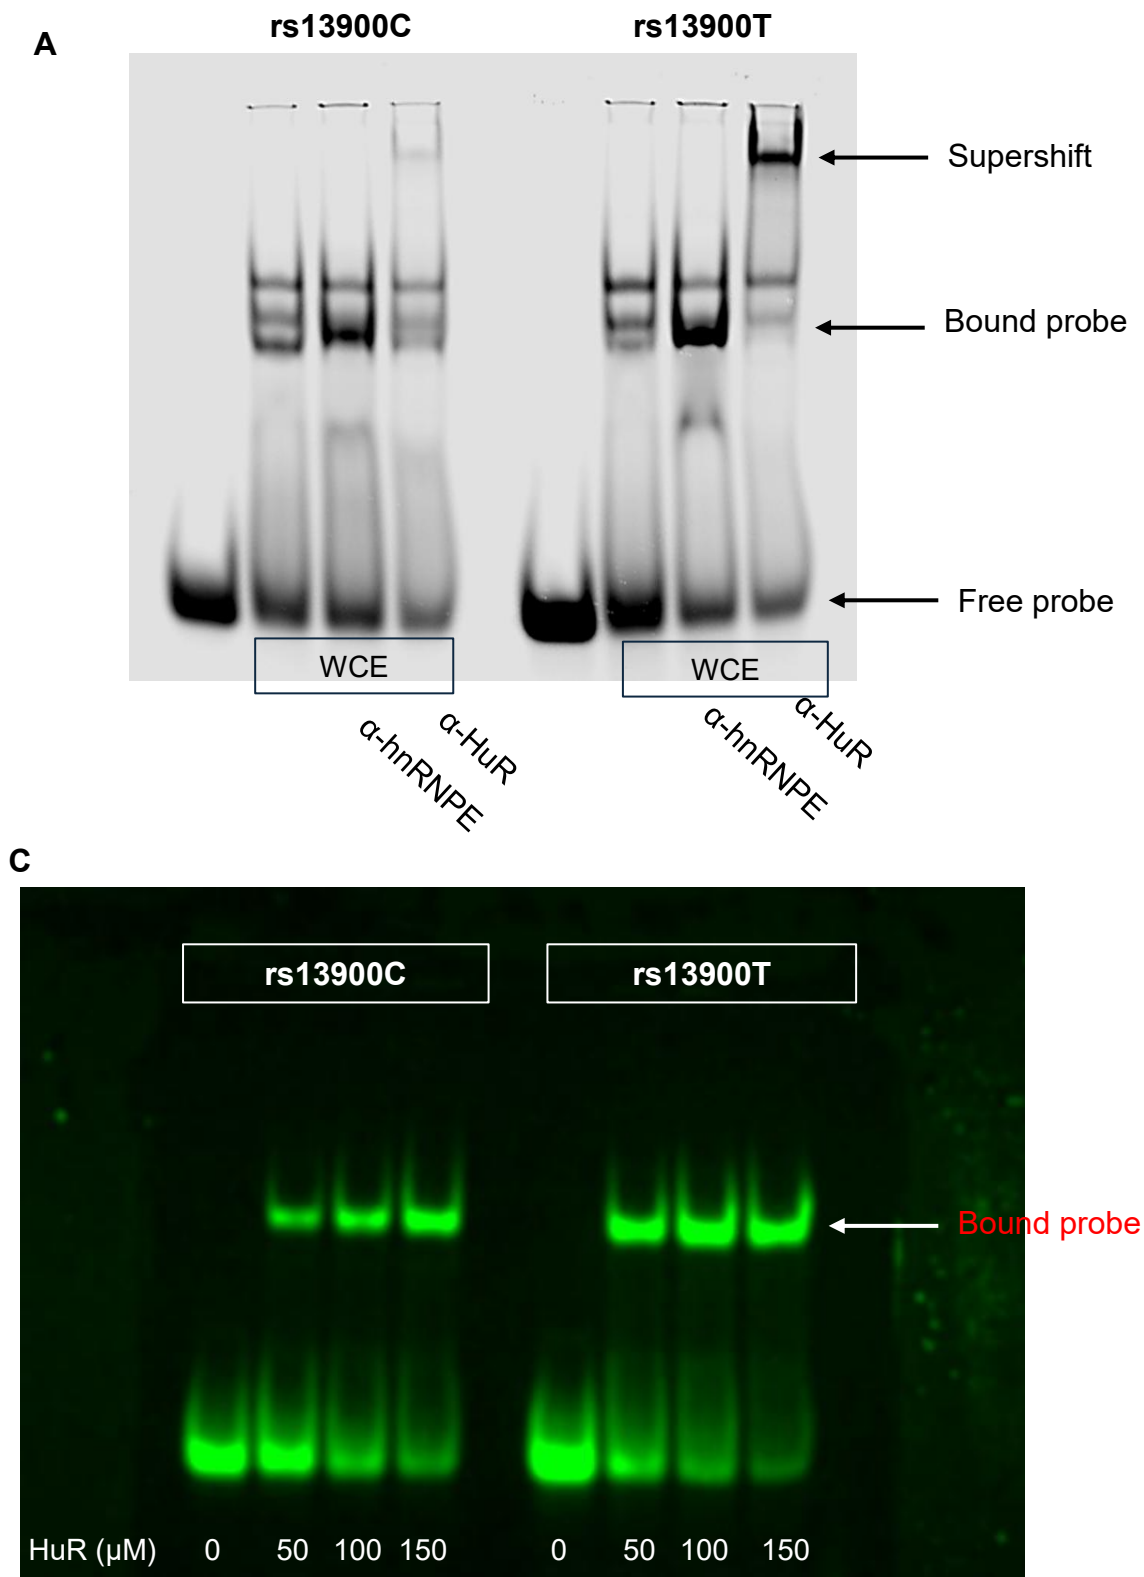

**Figure 4 –source data 1.** Original uncropped membranes corresponding to Figure 4 A and 4C. REMSA using labeled oligoribonucleotides containing either rs13900T or rs13900C allele incubated with whole-cell extracts (A) or purified recombinant HuR (C).
