# Supplementary material for: The RNA-binding protein HuR modulates the expression of the disease-linked CCL2 rs1024611G-rs13900T haplotype
Source: eLife journal article supplement (doi:10.7554/elife.93108), 2024-01-23
Supplement: fig4-figsupp1-data1 [file Figure 4 -figure supplement 1-source data 1.pdf › Figure 4 -figure supplement 1-source data 1.pdf]

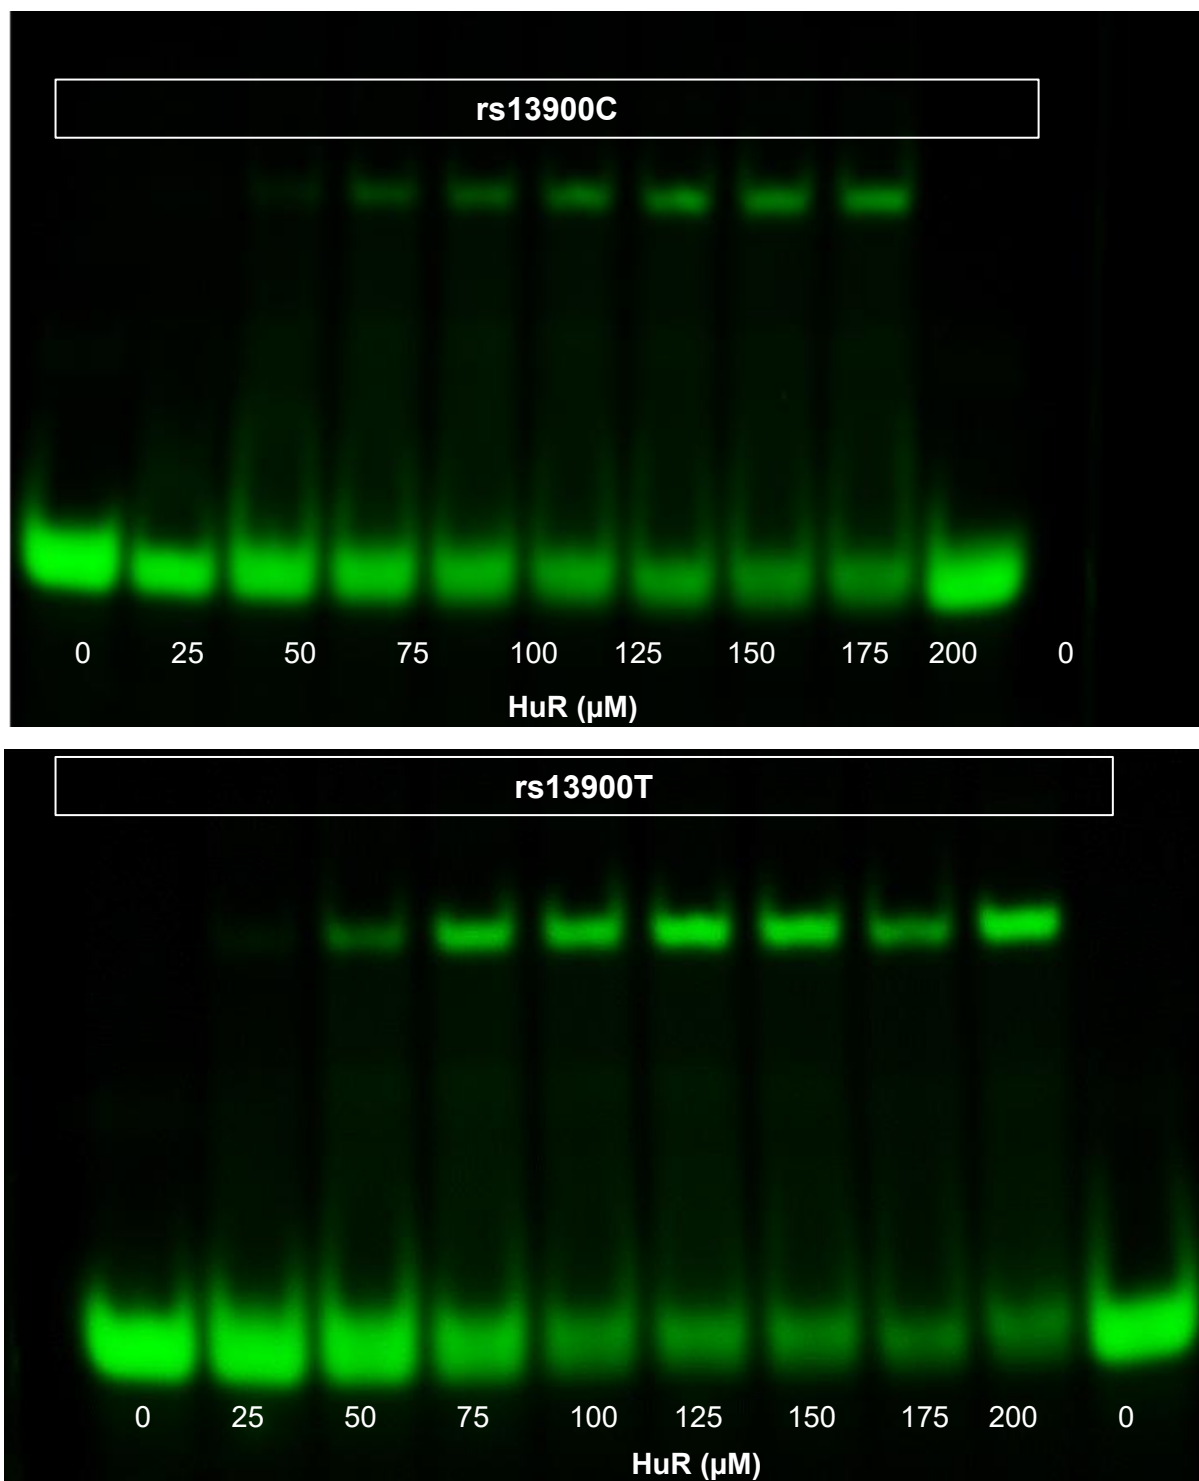

**Figure 4 – figure supplement 1-source data 1.** Original uncropped membranes corresponding to Figure 4 –figure supplement 1. REMSA using labeled oligoribonucleotides containing either rs13900T or rs13900C allele incubated with purified recombinant HuR at the indicated concentrations.
