# Supplementary material for: The RNA-binding protein HuR modulates the expression of the disease-linked CCL2 rs1024611G-rs13900T haplotype
Source: eLife journal article supplement (doi:10.7554/elife.93108), 2024-01-23
Supplement: fig5-data1 [file Figure 5 –source data 1.pdf › Figure 5 –source data 1.pdf]

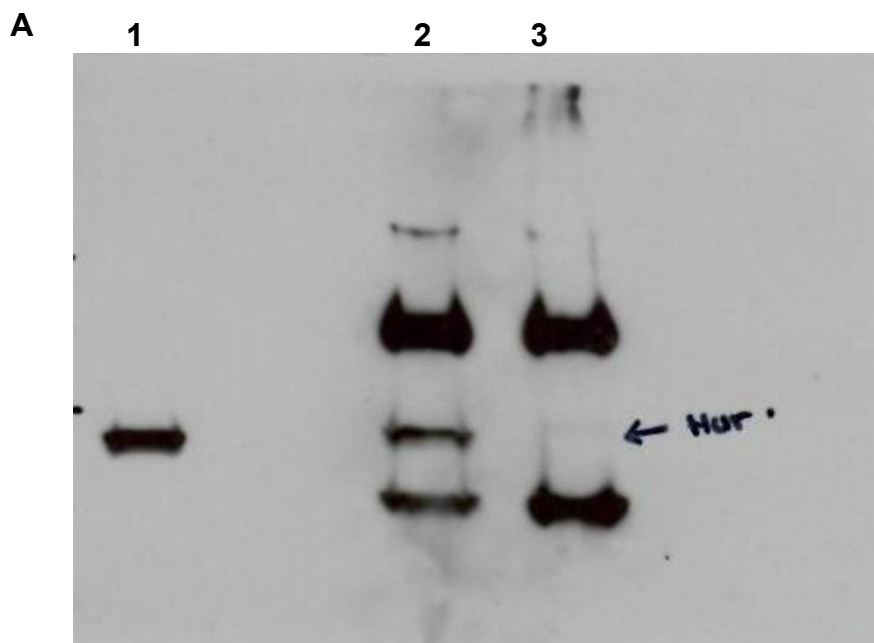

**B**

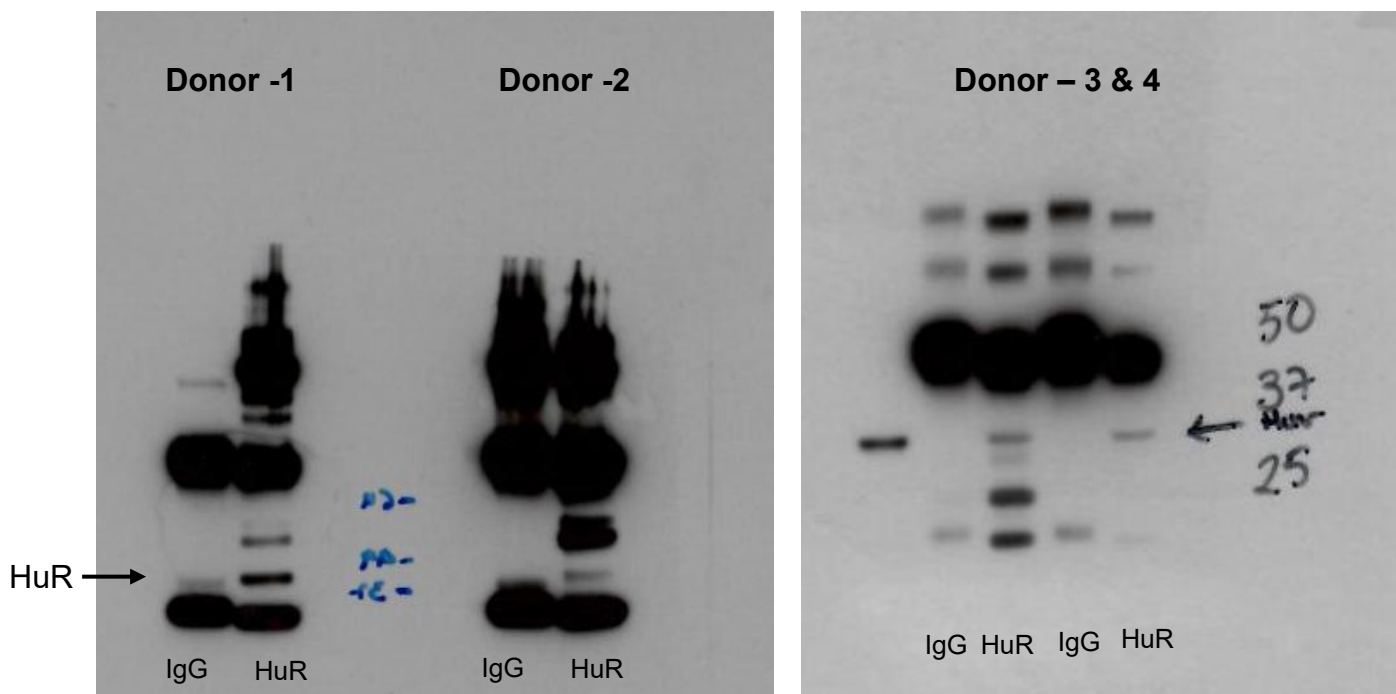

**Figure 5 –source data 1.** Original uncropped membranes showing HuR enrichment in immunoprecipitated material ( supporting data for Figure 5A).

**(A)** Quality check for RIP assay assessed by Western blot analysis of HuR expression levels by western blotting. Lane 1: Input sample (precleared cell lysate); Lane 2: post-IP beads of anti-HuR antibody; Lane 3: post-IP beads of Normal Rabbit IgG.

**(B)** Enrichment of HuR-containing RNP complexes following RIP in four heterozygous donors. Western blotting showing the relative enrichment of HuR in  $\alpha$ -HuR immunoprecipitated fractions compared to IgG control.
