# Supplementary material for: The RNA-binding protein HuR modulates the expression of the disease-linked CCL2 rs1024611G-rs13900T haplotype
Source: eLife journal article supplement (doi:10.7554/elife.93108), 2024-01-23
Supplement: fig5-data3 [file Figure 5 –source data 3.pdf › Figure 5 –source data 3.pdf]

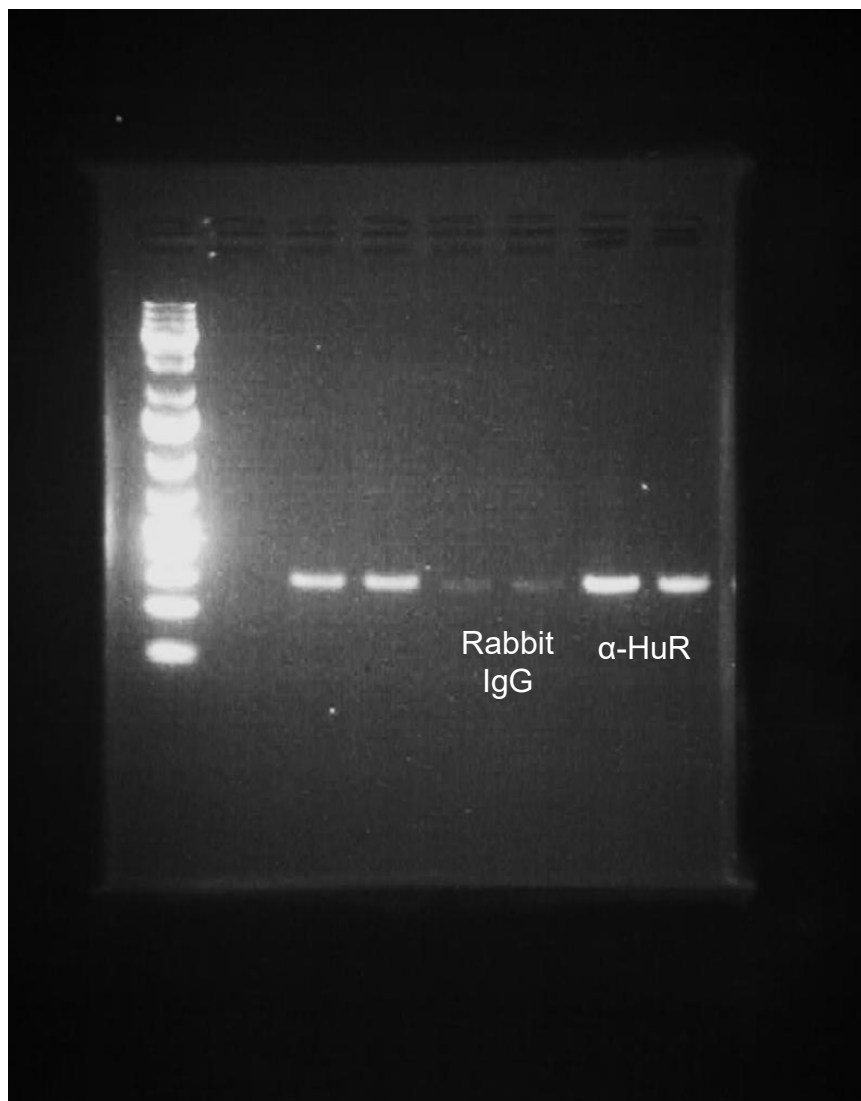

**Figure 5 –source data 3.** Original uncropped gel showing identification of target RNA (CCL2-3'UTR) from cellular RNP complex. (Figure 5B). The association of HuR with 3'UTR of CCL2 was tested by RIP assay, followed by detection of the target transcript of interest by RT-PCR of RIP materials. PCR products were visualized by electrophoresis in STBR safe stained 2% agarose gel.
