# Supplementary material for: The RNA-binding protein HuR modulates the expression of the disease-linked CCL2 rs1024611G-rs13900T haplotype
Source: eLife journal article supplement (doi:10.7554/elife.93108), 2024-01-23
Supplement: fig6-figsupp1-data1 [file Figure 6-Figure supplement 1 -source data 1.pdf › Figure 6-Figure supplement 1 -source data 1.pdf]

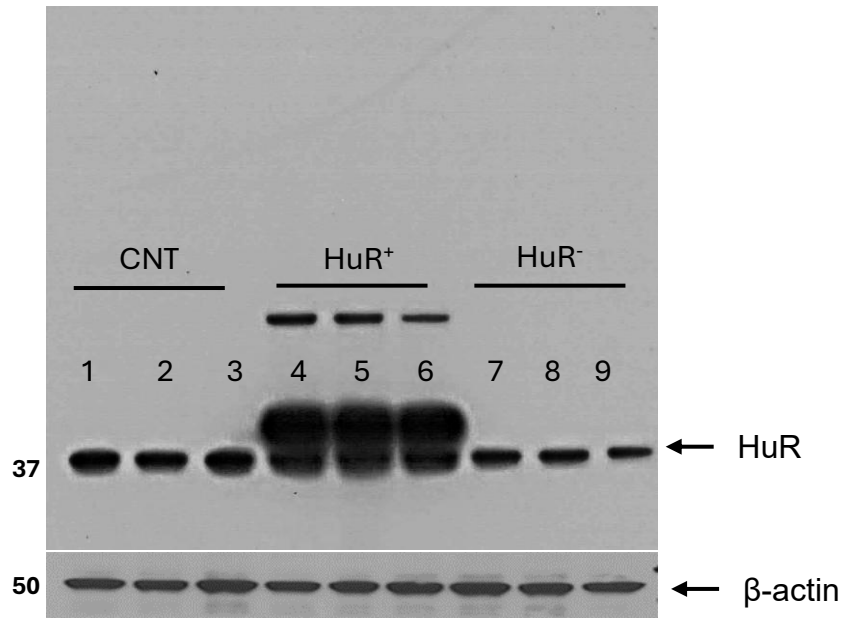

**Figure 6 – figure supplement 1 –source data 1.** Original uncropped Western blot showing HuR protein levels in HEK 293 cells transfected with either pCMV6-HuR (HuR<sup>+</sup>) or HuR-targeting siRNA (HuR<sup>-</sup>).
