# Supplementary material for: The RNA-binding protein HuR modulates the expression of the disease-linked CCL2 rs1024611G-rs13900T haplotype
Source: eLife. 2026 Jan 14;13:RP93108. doi: 10.7554/eLife.93108 (PMC12803514; doi:10.7554/eLife.93108)
Supplement: Figure 1—figure supplement 1—source data 1. [file elife-93108-fig1-figsupp1-data1.xlsx]

## Sheet: Fig 1 -fig sup2  Source data 1
	Figure 1 - figure supplement 2 -source data 1: Source Data for LPS induced CCL2 expression in PBMC
		Time (h)	CCL2 Expression
			(Fold Change)
		0	0.955504	1.21027	0.864737
		1	4.73162	4.63424	4.3299
		3	7.30727	7.70252	6.09375
		6	2.49377	2.3075	1.94845
