# Supplementary material for: The RNA-binding protein HuR modulates the expression of the disease-linked CCL2 rs1024611G-rs13900T haplotype
Source: eLife. 2026 Jan 14;13:RP93108. doi: 10.7554/eLife.93108 (PMC12803514; doi:10.7554/eLife.93108)
Supplement: Figure 1—source data 1. [file elife-93108-fig1-data1.xlsx]

## Sheet: Figure 1 -Source data 1
	Figure 1 -source data 1: Source Data for allelic expression imbalance (AEI) in PMCB of individuals heterozygous for rs13900. (Fig 1. D)
		Samples	AEI
			cDNA	gDNA
		Donor-1	1.41133	1.058
		Donor-2	1.08443	0.97
		Donor-3	1.26052	1.02
		Donor-4	1.01035	0.89
		Donor-5	1.35049	0.906
		Donor-6	1.347	0.95
