# Supplementary material for: The RNA-binding protein HuR modulates the expression of the disease-linked CCL2 rs1024611G-rs13900T haplotype
Source: eLife. 2026 Jan 14;13:RP93108. doi: 10.7554/eLife.93108 (PMC12803514; doi:10.7554/eLife.93108)
Supplement: Figure 2—source data 1. [file elife-93108-fig2-data1.xlsx]

## Sheet: Figure 2-Source data 1
	Figure 2 -source data 1: Source data for LPS induced CCL 2 expression in monocytes of individuals heterozygous for rs13900. (Fig 2.A)
			Samples	CCL2 Expression
				Cnt	LPS
			Donor-1	1	2.04959
			Donor-2	1	3.1199
			Donor-3	1	4.46915
			Donor-4	1	1.86025
			Donor-5	1	2.12383
			Donor-6	1	0.829896
	Figure 2 -source data 1: Source data for allelic ratio in nascent RNA of monocytes obtained from individuals heterozygous for rs13900. (Fig 2.C)
			Samples	AEI(T/C)
				gDNA	ActD-	AcTD+
			Donor-1	0.911	1.41	2.06
			Donor-2	1	1.55	2.64
			Donor-3	0.922	1.61	2.14
