# Supplementary material for: The RNA-binding protein HuR modulates the expression of the disease-linked CCL2 rs1024611G-rs13900T haplotype
Source: eLife. 2026 Jan 14;13:RP93108. doi: 10.7554/eLife.93108 (PMC12803514; doi:10.7554/eLife.93108)
Supplement: Figure 4—source data 3. [file elife-93108-fig4-data3.xlsx]

## Sheet: Figur4 -source data 3
	Figure 4 -source data 3: Source data for quantitative densitometric analysis of the antibody shifted complexes. (Fig. 4B Top panel)
	Riboprobes		% Signal
			Free	Bound	Free	Bound	Free	Bound
	rs13900C		100	46.1594	100	47.1533	100	40.4242
	rs13900T		100	65.193	100	70.2222	100	66.9892
	Figure 4 -source data 3: Source data for the protein complexes bound to the oligoribonucleotide conatining the rs13900 alleles. (Fig. 4B Bottom panel)
		Riboprobes		Relative Fold Change
		rs13900C		1	1	1
		rs13900T		7.82609	6.54237	7.40678
