# Supplementary material for: The RNA-binding protein HuR modulates the expression of the disease-linked CCL2 rs1024611G-rs13900T haplotype
Source: eLife. 2026 Jan 14;13:RP93108. doi: 10.7554/eLife.93108 (PMC12803514; doi:10.7554/eLife.93108)
Supplement: Figure 5—source data 5. [file elife-93108-fig5-data5.xlsx]

## Sheet: Figure 5Sourcedata 5
	Figure 5-Data Source 5: Source data for CCL2 expression in anti-HuR antibody enriched complexes. (Fig. 5 C)
	Groups		HuR Expression ( Fold Change)
			Donor-1	Donor-2	Donor-3	Donor-4
	IgG		1	1	1	1
	HuR		9.0051	8.2016	12.1915	11.67
	Figure 5-Data Source 5:Source data for relative expression levels of ras13900C and rs13900 T allele in macrophages from heterozygous donors. (Fig. 5D)
	Groups		Relative Expression of rs13900 C and T alllele
			Donor-1	Donor-2	Donor-3	Donor-4	Donor-5	Donor-6
	C		41.4709	47.9748	44.2376	49.7425	42.5443	42.6076
	T		58.5291	52.0252	55.7624	50.2575	57.4557	57.3924
