# Supplementary material for: The RNA-binding protein HuR modulates the expression of the disease-linked CCL2 rs1024611G-rs13900T haplotype
Source: eLife. 2026 Jan 14;13:RP93108. doi: 10.7554/eLife.93108 (PMC12803514; doi:10.7554/eLife.93108)
Supplement: Figure 6—source data 1. [file elife-93108-fig6-data1.xlsx]

## Sheet: Figur6_Sourcedata1
	Figure6-Data Source 1: Source data for relative luciferase activities of the 3′ UTR reporter plasmids. (Fig. 6B)
		Groups	Relative luciferase activity (%)
			Replicate1	Replicate2	Replicate3	Replicate4
		Cnt	104.323	95.6774	101.595	98.4053
		rs13900C	46.3502	45.5398	47.1817	46.0073
		rs13900T	61.9723	64.884	77.0329	74.9534
	Figure6-Data Source 1: Source data for relative luciferase activities of the 3′ UTR reporter plasmids. (Fig. 6C)
		Group			Relative luciferase activity (%)
					Replicate1	Replicate2	Replicate3
		pLightswitch-C+pCMV6-Entry			100	100	100
		pLightswitch-T+pCMV6-Entry			123.193	116.692	114.118
		pLightswitch-C+pCMV6-HuR			85.3041	89.0014	83.2153
		pLightswitch-T+pCMV6-HuR			161.272	174.011	168.207
	Figure6-Data Source 1: Source data for relative luciferase activities of the 3′ UTR reporter plasmids. (Fig. 6D)
		Group			Relative luciferase activity (%)
					Replicate1	Replicate2	Replicate3
		pLightswitch-C+cnt-siRNA			100	100	100
		pLightswitch-T+cnt-siRNA			128.129	121.358	124.769
		pLightswitch-C+HuR-siRNA			102.057	99.5806	102.664
		pLightswitch-T+huR-siRNA			106.979	102.516	106.763
