# Supplementary material for: The RNA-binding protein HuR modulates the expression of the disease-linked CCL2 rs1024611G-rs13900T haplotype
Source: eLife. 2026 Jan 14;13:RP93108. doi: 10.7554/eLife.93108 (PMC12803514; doi:10.7554/eLife.93108)
Supplement: Figure 7—source data 1. [file elife-93108-fig7-data1.xlsx]

## Sheet: Figure 78_Sourcedata 1
	Figure7-Data Source 1: Source data for rs13900 allelic influence on relative luciferase mRNA expression. (Fig 7.A)
	Groups	Relative mRNA (Fold change)
		Replicate1	Replicate2	Replicate3	Replicate4	Replicate5	Replicate6
	Cnt	0.957272	0.965267	1.08297
	rs13900C	0.598741	0.606677	0.754713	0.539613	0.766842	0.733567
	rs13900T	0.739181	0.705638	0.705149	0.625031	0.946713	0.689203
	Figure7-Data Source 1: Source data for rs13900 allelic relative luciferase activity. (Fig. 7B)
		Groups	Relative luciferase activity
			Replicate1	Replicate2	Replicate3	Replicate4
		Cnt	107.756	92.2444	97.6925
		rs13900C	47.1457	45.983	40.9961	43.4895
		rs13900T	58.183	80.3873	63.5454	65.5946
	Figure7-Data Source 1: Source data for rs13900 allelic influence on translatability. (Fig. 7C)
		Groups	Relative translatability
			Replicate1	Replicate2	Replicate3	Replicate4
		Cnt	1.07648	0.921522	0.975949
		rs13900C	0.707159	0.689719	0.614918	0.652318
		rs13900T	0.791442	1.09348	0.864387	0.892261
