# Supplementary material for: The RNA-binding protein HuR modulates the expression of the disease-linked CCL2 rs1024611G-rs13900T haplotype
Source: eLife. 2026 Jan 14;13:RP93108. doi: 10.7554/eLife.93108 (PMC12803514; doi:10.7554/eLife.93108)
Supplement: Figure 8—source data 1. [file elife-93108-fig8-data1.xlsx]

## Sheet: Figure8_Sourcedata1_Fig8A
	Figure 8-source data 1: Source data for HuR expression in primary macrophages following lentiviral transduction. (Fig. 8A)
	Groups		HuR Expression ( Fold Change)
			Donor-1	Donor-2	Donor-3	Donor-4
	rs13900C		0.90177	1.2205	1.168	0.9568
	rs13900T		2.61988	1.5653	1.8031	2.1684
	Figure 8-source data 1: Source data for CCL2 expression in homozygous primary macrophages. (Fig 8B)
	Groups		CCL2 Expression ( Fold Change)
			Donor-1	Donor-2	Donor-3	Donor-4
	CMV-Null		1	1	1	1
	pCMV6-HuR		3.49	4.6	5.2	6.7
